# Supplementary material
Source: Springer Nature journal article supplement (https://www.springermedizin.de/resource/supplementary/12885_2014_4712_MOESM8_ESM.pdf/9467102)

**A**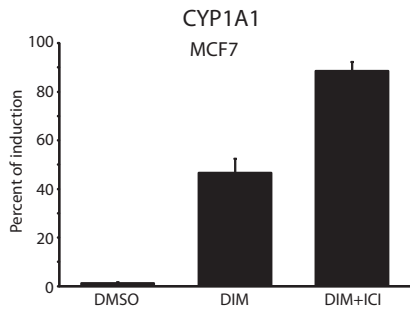**B**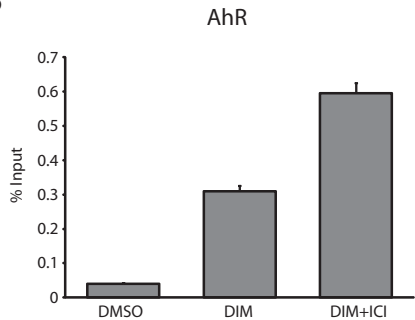**C**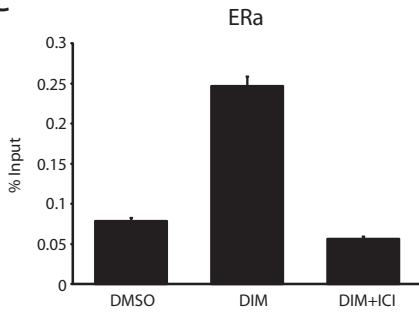

Supplement: MOESM8 [file 9467102]
